# Supplementary material for: On the Intermolecular Interactions in Thiophene-Cored Single-Stacking Junctions
Source: MDPI journal article supplement (doi:10.3390/ijms241713349), 2023-08-28

Supplementary Information to “On the Intermolecular Interactions in  
Thiophene-Cored Single-Stacking Junctions” by Czernek & Brus  
(*IJMS* 2023)

**Table of Contents**

Table S1 – the canonical and DLPNO CCSD(T)/CBS results ... page S2

Table S2 – details of the SAPT-DFT/CBS results for the **S-T<sub>1</sub>** dimers in their B97-D geometry ... page S3

Table S3 – details of the SAPT-DFT/CBS results for the **S-T<sub>1</sub>** dimers in their B2PLYP-D3 geometry ... page S4

Table S4 – details of the SAPT-DFT/CBS results for the **S-T<sub>2</sub>** dimers in their B97-D geometry ... page S5

Table S5 – the B97-D and DLPNO CCSD(T)/CBS interaction energies ... page S5

Table S6 – underlying data for Figure 7 ... page S6

Table S7 – underlying data for Figure 8 ... page S7

Table S8 – underlying data for Figure 9 ... page S8

Figure S1 – structures of the unsymmetric **S-T<sub>1</sub>** dimer ... page S8

Figure S2 – dependence of the  $\Delta E_{\text{HF}}$  data upon molecular size ... page S9

Figure S3 – dependence of the  $\Delta E_{\text{MP2}}$  data upon molecular size ... page S10

Figure S4 – dependence of the  $\Delta E_{\text{post MP2}}$  data upon molecular size ... page S11

Figure S5 – dependence of the B97-D interaction energy upon molecular size ... page S12

Figure S6 – definition of the dihedral angle  $\beta$  in **S-T<sub>1</sub>** dimers ... page S13

Figure S7 – definition of the dihedral angle  $\beta$  in **S-T<sub>2</sub>** dimers ... page S13

Table S1. The variation of the interaction energy terms (in J/mol) of the **S-T<sub>1</sub>** dimers with the dihedral angle  $\beta$  (in degrees), which is defined in Figure S5. The respective terms were obtained using procedures expressed by Eq. 1 and (for values in parentheses) Eq. 2, and  $\Delta E = \Delta E_{\text{HF}} + \Delta E_{\text{MP2}} + \Delta E_{\text{post MP2}}$ .

| $\beta$ | $\Delta E_{\text{HF}}$ | $\Delta E_{\text{MP2}}$ | $\Delta E_{\text{post MP2}}$ | $\Delta E$         |
|---------|------------------------|-------------------------|------------------------------|--------------------|
| 163.3   | 35324<br>(35345)       | −106415<br>(−107485)    | 24635<br>(27176)             | −46455<br>(−44964) |
| 168.0   | 37611<br>(37639)       | −110698<br>(−111975)    | 25908<br>(28669)             | −47180<br>(−45668) |
| 172.0   | 42207<br>(42245)       | −11573<br>(−117595)     | 27250<br>(30364)             | −46297<br>(−44985) |
| 176.0   | 49694<br>(49749)       | −122176<br>(−124049)    | 28878<br>(32239)             | −43604<br>(−42061) |
| 180.0   | 60679<br>(60756)       | −130380<br>(−132178)    | 30834<br>(34171)             | −38868<br>(−37252) |

Table S2. Raw data, in J/mol, used to obtain the SAPT-DFT/CBS interaction energies of **S-T<sub>1</sub>** dimers in their B97-D/def2-TZVPP geometry that are presented in Table 1, where the respective terms are:  $E_{\text{elst}} = E_{\text{elst}}^{\text{SAPT}(1)}$ ;  $E_{\text{exch}} = E_{\text{exch}}^{\text{SAPT}(1)}$ ;  $E_{\text{ind}} = E_{\text{ind}}^{\text{SAPT}(2)} + E_{\text{ind.-exc}}^{\text{SAPT}(2)} + E_{\delta(\text{HF})}^{\text{SAPT}}$ ;  $E_{\text{disp}} = E_{\text{disp}}^{\text{SAPT}(2)} + E_{\text{disp.-exch}}^{\text{SAPT}(2)}$ ; and  $E_{\text{total}} = E_{\text{elst}} + E_{\text{exch}} + E_{\text{ind}} + E_{\text{disp}}$ .

| interaction energy term                  | the unsymmetric minimum | the symmetric minimum |
|------------------------------------------|-------------------------|-----------------------|
| $E_{\text{elst}}^{\text{SAPT}(1)}$       | −38873                  | −32073                |
| $E_{\text{exch}}^{\text{SAPT}(1)}$       | 87127                   | 80591                 |
| $E_{\text{disp}}^{\text{SAPT}(2)}$       | −42376                  | −40805                |
| $E_{\text{disp.-exch}}^{\text{SAPT}(2)}$ | 38840                   | 37799                 |
| $E_{\text{ind}}^{\text{SAPT}(2)}$        | −103060                 | −99805                |
| $E_{\text{ind.-exch}}^{\text{SAPT}(2)}$  | 15584                   | 14962                 |
| $E_{\delta(\text{HF})}^{\text{SAPT}}$    | −7360                   | −6670                 |
| $E_{\text{total}}$                       | −50118                  | −46002                |

Table S3. Raw data, in J/mol, used to obtain the SAPT-DFT/CBS interaction energies of **S-T<sub>1</sub>** dimers in their B2PLYP-D3/def2-QZVPPD geometry that are presented in Table 1, where the respective terms are:  $E_{\text{elst}} = E_{\text{elst}}^{\text{SAPT (1)}}$ ;  $E_{\text{exch}} = E_{\text{exch}}^{\text{SAPT (1)}}$ ;  $E_{\text{ind}} = E_{\text{ind}}^{\text{SAPT (2)}} + E_{\text{ind.-exch.}}^{\text{SAPT (2)}} + E_{\delta(\text{HF})}^{\text{SAPT}}$ ;  $E_{\text{disp}} = E_{\text{disp.}}^{\text{SAPT (2)}} + E_{\text{disp.-exc}}^{\text{SAPT (2)}}$ ; and  $E_{\text{total}} = E_{\text{elst}} + E_{\text{exch}} + E_{\text{ind}} + E_{\text{disp}}$ .

| interaction energy term                    | the unsymmetric minimum | the symmetric minimum |
|--------------------------------------------|-------------------------|-----------------------|
| $E_{\text{elst}}^{\text{SAPT (1)}}$        | −32951                  | −31160                |
| $E_{\text{exch.}}^{\text{SAPT (1)}}$       | 74690                   | 77551                 |
| $E_{\text{disp.}}^{\text{SAPT (2)}}$       | −35266                  | −40096                |
| $E_{\text{disp.-exch.}}^{\text{SAPT (2)}}$ | 32031                   | 37300                 |
| $E_{\text{ind.}}^{\text{SAPT (2)}}$        | −96251                  | −98367                |
| $E_{\text{ind.-exch.}}^{\text{SAPT (2)}}$  | 13754                   | 14615                 |
| $E_{\delta(\text{HF})}^{\text{SAPT}}$      | −6253                   | −6185                 |
| $E_{\text{total}}$                         | −50246                  | −46343                |

Table S4. Raw data, in J/mol, used to obtain the SAPT-DFT/CBS interaction energies of **S-T<sub>2</sub>** dimers in their B97-D/def2-TZVPP geometry that are presented in Table 2, where the respective terms are:  $E_{\text{elst}} = E_{\text{elst}}^{\text{SAPT}(1)}$ ;  $E_{\text{exch}} = E_{\text{exch}}^{\text{SAPT}(1)}$ ;  $E_{\text{ind}} = E_{\text{ind}}^{\text{SAPT}(2)} + E_{\text{ind.-exch.}}^{\text{SAPT}(2)} + E_{\delta(\text{HF})}^{\text{SAPT}}$ ;  $E_{\text{disp}} = E_{\text{disp.}}^{\text{SAPT}(2)} + E_{\text{disp.-exc}}^{\text{SAPT}(2)}$ ; and  $E_{\text{total}} = E_{\text{elst}} + E_{\text{exch}} + E_{\text{ind}} + E_{\text{disp}}$ .

| interaction energy term                   | the unsymmetric minimum | the symmetric minimum |
|-------------------------------------------|-------------------------|-----------------------|
| $E_{\text{elst}}^{\text{SAPT}(1)}$        | −41851                  | −38830                |
| $E_{\text{exch.}}^{\text{SAPT}(1)}$       | 113561                  | 106909                |
| $E_{\text{disp.}}^{\text{SAPT}(2)}$       | −56534                  | −56160                |
| $E_{\text{disp.-exch.}}^{\text{SAPT}(2)}$ | 52904                   | 53269                 |
| $E_{\text{ind.}}^{\text{SAPT}(2)}$        | −146632                 | −142805               |
| $E_{\text{ind.-exch.}}^{\text{SAPT}(2)}$  | 21684                   | 21002                 |
| $E_{\delta(\text{HF})}^{\text{SAPT}}$     | −9064                   | −7630                 |
| $E_{\text{total}}$                        | −65932                  | −64245                |

Table S5. The B97-D/def2-TZVPP interaction energy (denoted as  $\Delta E(\text{DFT})$ ) and its  $\Delta E(\text{CC})$  counterpart for the symmetric **S-T<sub>n</sub>** dimers. All values are in kJ/mol.

| system                 | $\Delta E(\text{DFT})$ | $\Delta E(\text{CC})$ |
|------------------------|------------------------|-----------------------|
| <b>S-T<sub>1</sub></b> | −40961                 | −44964                |
| <b>S-T<sub>2</sub></b> | −56651                 | −64634                |
| <b>S-T<sub>3</sub></b> | −75354                 | −87590                |
| <b>S-T<sub>4</sub></b> | −88826                 | −105801               |
| <b>S-T<sub>5</sub></b> | −101839                | −123937               |
| <b>S-T<sub>6</sub></b> | −125562                | −126727               |

Table S6. Raw data, in J/mol, used to obtain the SAPT-DFT/CBS interaction energies of **S-T<sub>1</sub>** dimers that are presented in Figure 7, where the respective terms are:  $E_{\text{elst}} = E_{\text{elst}}^{\text{SAPT}(1)}$ ;  $E_{\text{exch}} = E_{\text{exch}}^{\text{SAPT}(1)}$ ;  $E_{\text{ind}} = E_{\text{ind}}^{\text{SAPT}(2)} + E_{\text{ind.-exc}}^{\text{SAPT}(2)} + E_{\delta(\text{HF})}^{\text{SAPT}}$ ;  $E_{\text{disp}} = E_{\text{disp}}^{\text{SAPT}(2)} + E_{\text{disp.-exch}}^{\text{SAPT}(2)}$ ; and  $E_{\text{total}} = E_{\text{elst}} + E_{\text{exch}} + E_{\text{ind}} + E_{\text{disp}}$ . For each structure, also the  $\Delta E(\text{CC})$  value is shown (in J/mol).

| term                                     | the dihedral angle $\beta$ (in degrees) |         |         |         |         |
|------------------------------------------|-----------------------------------------|---------|---------|---------|---------|
|                                          | 163.2                                   | 168.0   | 172.0   | 176.0   | 180.0   |
| $E_{\text{elst}}^{\text{SAPT}(1)}$       | −32073                                  | −35884  | −40947  | −48104  | −57887  |
| $E_{\text{exch}}^{\text{SAPT}(1)}$       | 80591                                   | 87020   | 97076   | 112230  | 133641  |
| $E_{\text{disp}}^{\text{SAPT}(2)}$       | −40805                                  | −46655  | −54962  | −67274  | −84834  |
| $E_{\text{disp.-exch}}^{\text{SAPT}(2)}$ | 37799                                   | 43581   | 51750   | 63780   | 80784   |
| $E_{\text{ind}}^{\text{SAPT}(2)}$        | −99805                                  | −104180 | −109644 | −116850 | −125953 |
| $E_{\text{ind.-exch}}^{\text{SAPT}(2)}$  | 14962                                   | 16135   | 17695   | 19830   | 22599   |
| $E_{\delta(\text{HF})}^{\text{SAPT}}$    | −6670                                   | −7025   | −7628   | −8527   | −9711   |
| $E_{\text{total}}$                       | −46002                                  | −47007  | −46659  | −44915  | −41361  |
| $\Delta E(\text{CC})$                    | −44964                                  | −45668  | −44985  | −42061  | −37252  |

Table S7. Raw data, in J/mol, used to obtain the SAPT-DFT/CBS interaction energies of **S-T<sub>2</sub>** dimers that are presented in Figure 8, where the respective terms are:  $E_{\text{elst}} = E_{\text{elst}}^{\text{SAPT}(1)}$ ;  $E_{\text{exch}} = E_{\text{exch}}^{\text{SAPT}(1)}$ ;  $E_{\text{ind}} = E_{\text{ind}}^{\text{SAPT}(2)} + E_{\text{ind.-exch.}}^{\text{SAPT}(2)} + E_{\delta(\text{HF})}^{\text{SAPT}}$ ;  $E_{\text{disp}} = E_{\text{disp.}}^{\text{SAPT}(2)} + E_{\text{disp.-exch.}}^{\text{SAPT}(2)}$ ; and  $E_{\text{total}} = E_{\text{elst}} + E_{\text{exch}} + E_{\text{ind}} + E_{\text{disp}}$ . For each structure, also the  $\Delta E(\text{CC})$  value is shown (in J/mol).

| term                                      | the dihedral angle $\beta$ (in degrees) |         |         |         |         |
|-------------------------------------------|-----------------------------------------|---------|---------|---------|---------|
|                                           | 158.2                                   | 163.5   | 169.0   | 174.5   | 180.0   |
| $E_{\text{elst}}^{\text{SAPT}(1)}$        | −38830                                  | −37292  | −38118  | −41719  | −48765  |
| $E_{\text{exch.}}^{\text{SAPT}(1)}$       | 106909                                  | 105927  | 111241  | 123787  | 145096  |
| $E_{\text{disp.}}^{\text{SAPT}(2)}$       | −56160                                  | −55865  | −59526  | −68207  | −83621  |
| $E_{\text{disp.-exch.}}^{\text{SAPT}(2)}$ | 53269                                   | 52840   | 56265   | 64569   | 79336   |
| $E_{\text{ind.}}^{\text{SAPT}(2)}$        | −142805                                 | −142060 | −144026 | −148952 | −157053 |
| $E_{\text{ind.-exch.}}^{\text{SAPT}(2)}$  | 21002                                   | 20683   | 21144   | 22487   | 24814   |
| $E_{\delta(\text{HF})}^{\text{SAPT}}$     | −7630                                   | −7603   | −7962   | −8761   | −10074  |
| $E_{\text{total}}$                        | −64245                                  | −63368  | −60982  | −56795  | −50265  |
| $\Delta E(\text{CC})$                     | −64634                                  | −64189  | −61754  | −56953  | −49561  |

Table S8. The energetics data at  $T = 298.15$  K related to the formation of **S-T<sub>n</sub>** dimers. All values are in J/mol.

| system                 | $\Delta E(\text{CC})$ | $\Delta E(\text{VZPE})$ | $\Delta H_T$ | $-T\Delta S$ | $\Delta G$ |
|------------------------|-----------------------|-------------------------|--------------|--------------|------------|
| <b>S-T<sub>1</sub></b> | -44964                | 3998                    | 2402         | 48341        | 9778       |
| <b>S-T<sub>2</sub></b> | -64634                | 4298                    | 2013         | 56606        | -1717      |
| <b>S-T<sub>3</sub></b> | -87590                | 4431                    | 1662         | 63631        | -17866     |
| <b>S-T<sub>4</sub></b> | -105801               | 5370                    | 973          | 78083        | -21375     |
| <b>S-T<sub>5</sub></b> | -123937               | 5316                    | 558          | 88714        | -29350     |
| <b>S-T<sub>6</sub></b> | -126727               | 7736                    | -608         | 99217        | -20382     |

Figure S1. The overlay of optimized structures of the unsymmetric **S-T<sub>1</sub>** dimer: the B97-D/def2-TZVPP and B2PLYP-D3/def2-QZVPPD minimum is colored in magenta and cyan, respectively. Distances between the methyl carbon and the centroid of 2-thiophene ring are shown (schematically indicated by the black line).

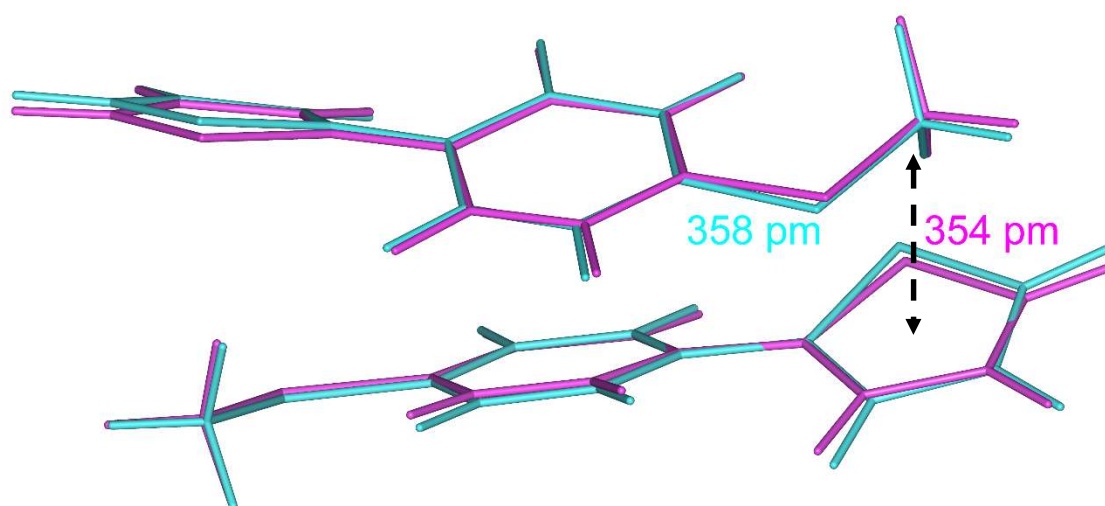



Figure S2. The dependence of the HF portion of the total interaction energy upon molecular size of investigated dimers. The red line is  $\{\Delta E(\text{HF})\} = a \times \{n - 1\} + 35.345 \text{ kJ/mol}$  with  $a = 16.13$  that has the standard deviation is 0.27.

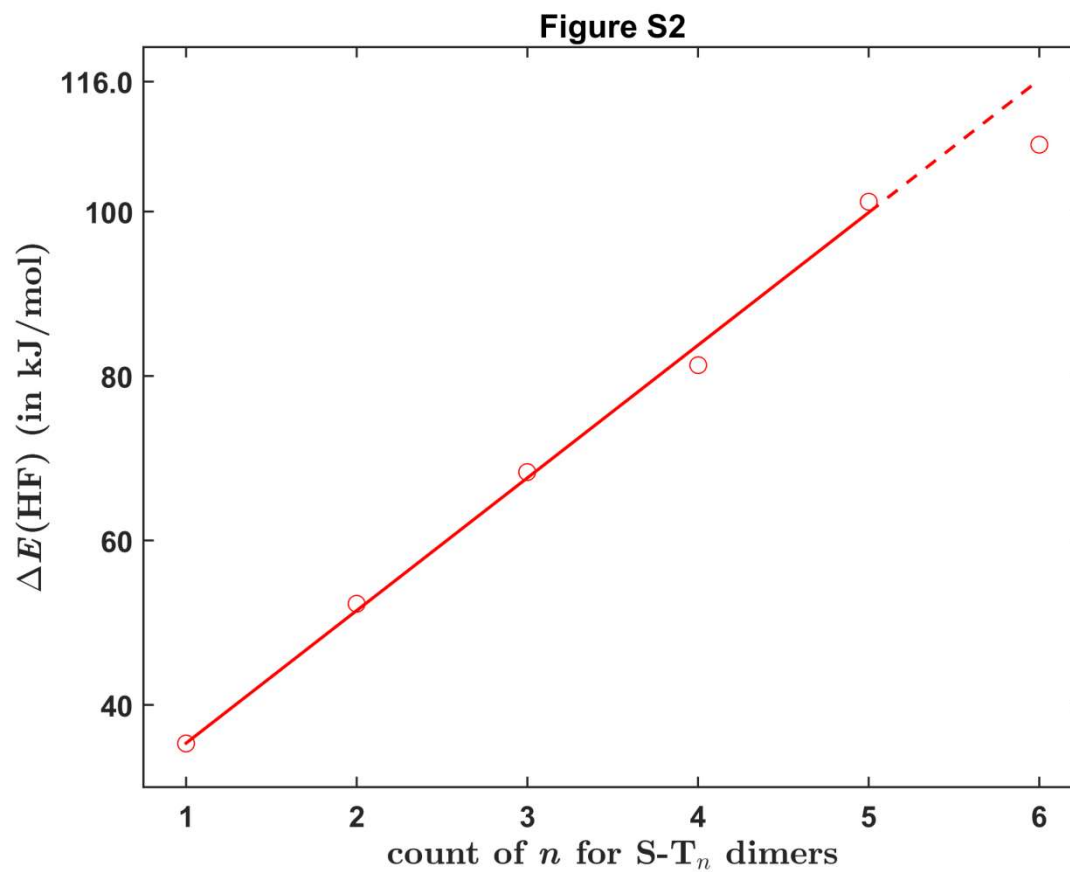

Figure S3. The dependence of the MP2 portion of the total interaction energy upon molecular size of investigated dimers. The red line is  $\{\Delta E(\text{MP2})\} = a \times \{n - 1\} - 107.485$  kJ/mol with  $a = -51.88$  that has the standard deviation is 0.38.

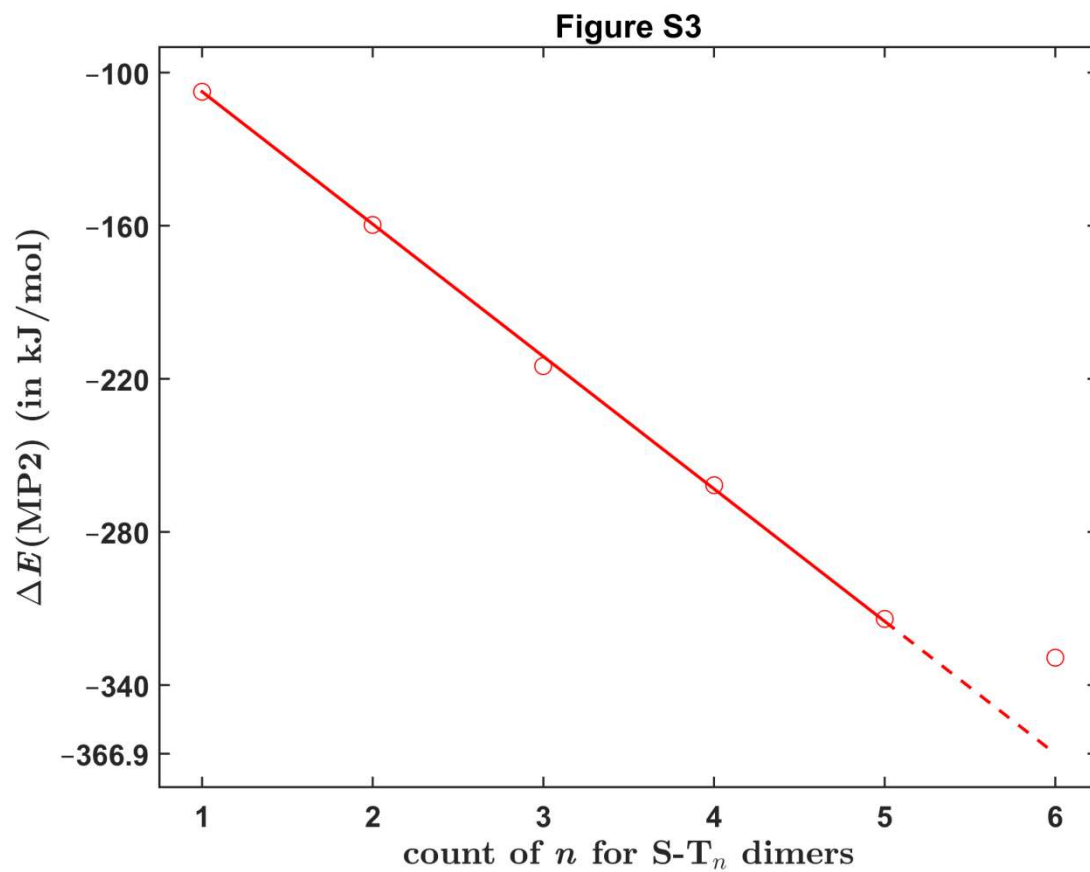

Figure S4. The dependence of the post MP2 portion of the total interaction energy upon molecular size of investigated dimers. The red line is  $\{\Delta E(\text{post MP2})\} = a \times \{n - 1\} + 27.176 \text{ kJ/mol}$  with  $a = 15.64$  that has the standard deviation of 0.10.

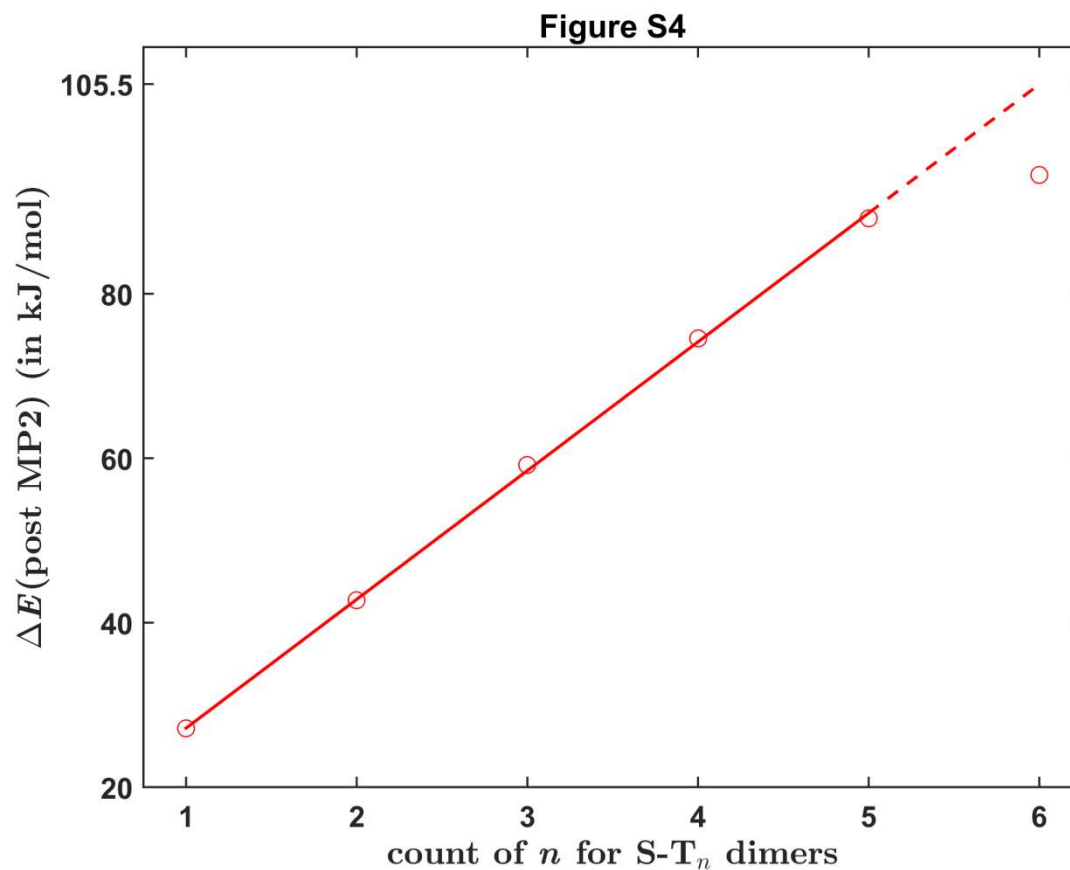

Figure S5. The dependence of the B97-D/def2-TZVPP interaction energy (denoted as  $\Delta E(\text{DFT})$ ) upon molecular size of investigated dimers. The red line is  $\{\Delta E(\text{DFT})\} = a \times \{n - 1\} - 40.961 \text{ kJ/mol}$  with  $a = -16.27$  that has the standard deviation of 0.35.

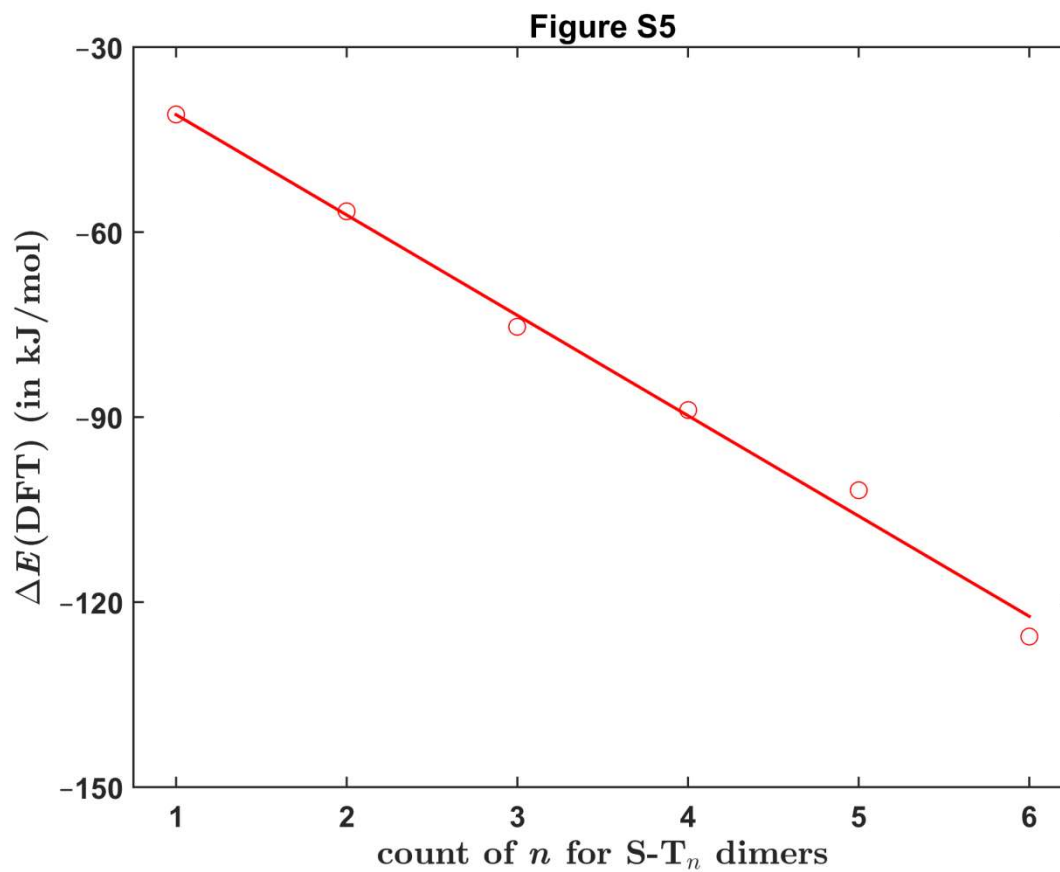

Figure S6. The chain of atoms defining the dihedral angle  $\beta$  in **S-T<sub>1</sub>** dimers investigated in main text.

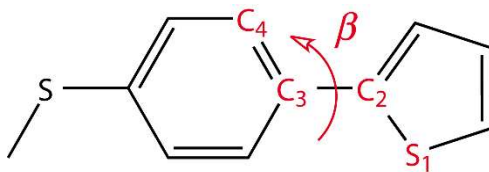

Figure S7. The chain of atoms defining the dihedral angle  $\beta$  in **S-T<sub>2</sub>** dimers investigated in main text.

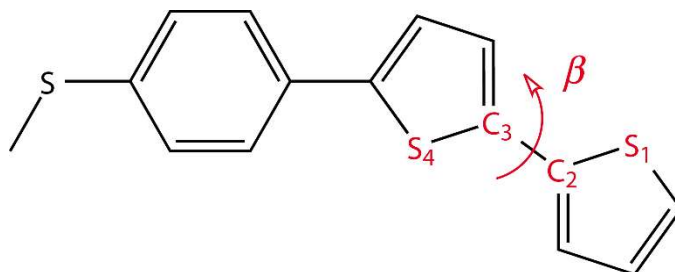

Supplement: s1 [file s1]
