# Supplementary material for: On the Intermolecular Interactions in Thiophene-Cored Single-Stacking Junctions
Source: Int J Mol Sci. 2023 Aug 28;24(17):13349. doi: 10.3390/ijms241713349 (PMC10487960; doi:10.3390/ijms241713349)
Supplement: Supplementary file 1 [file ijms-24-13349-s001.zip]

Archive with 4 entries (4 files):
- canonical.xlsx
- DLPNO.xlsx
- SI.pdf
- structures.zip
