# Supplementary material for: On the Intermolecular Interactions in Thiophene-Cored Single-Stacking Junctions
Source: Int J Mol Sci. 2023 Aug 28;24(17):13349. doi: 10.3390/ijms241713349 (PMC10487960; doi:10.3390/ijms241713349)
Supplement: Supplementary file 1 [file ijms-24-13349-s001.zip › canonical.xlsx]

## Sheet: 1
S-T1: the first conformer; its geometry is listed below
quantity (named in a self-explanatory way)	value	unit (with comments)
HF_dimer	-2435.25	h
HF_monomer1	-1217.63	h
HF_monomer2	-1217.63	h
MP2a5Z_dimer	-4.66087	h
MP2a5Z_monomer1	-2.31016	h
MP2a5Z_monomer2	-2.31017	h
CCaTZ_dimer	-4.65979	h
CCaTZ_monomer1	-2.31469	h
CCaTZ_monomer2	-2.31469	h
MP2aTZ_dimer	-4.33401	h
MP2aTZ_monomer1	-2.14711	h
MP2aTZ_monomer2	-2.14711	h
correction_dimer	-0.325778	in h: CCaTZ_dimer - MP2aTZ_dimer
correction_monomer1	-0.16758	in h: CCaTZ_monomer1 - MP2aTZ_monomer1
correction_monomer2	-0.16758	in h: CCaTZ_monomer2 - MP2aTZ_monomer2
E_dimer	-2440.23	in h: HF_dimer + MP2a5Z_dimer + correction_dimer
E_monomer1	-1220.11	in h: HF_monomer1 + MP2a5Z_monomer1 + correction_monomer1
E_monomer2	-1220.11	in h: HF_monomer2 + MP2a5Z_monomer2 + correction_monomer2
HF_part	35.3247	kJ/mol: 2625.5*(HF_dimer-HF_monomer1-HF_monomer2)
MP2_part	-106.415	kJ/mol: 2625.5*(MP2a5Z_dimer-MP2a5Z_monomer1-MP2a5Z_monomer2)
correction_part	24.635	kJ/mol: 2625.5*(correction_dimer-correction_monomer1-correction_monomer2)
dE	-46.4548	kJ/mol: 2625.5*(E_dimer - E_monomer1 - E_monomer2)
		Turbomole input of coordinates (in Bohr):
		-4.60124502808380 -1.59785604193532 1.75342207664673 c
		-2.00615027020659 -2.02076541211833 1.85937524146537 c
		-0.78862050977584 -3.67425499140581 0.17287970554091 c
		-2.30801701239988 -4.89083610931786 -1.65166599356924 c
		-4.89368770605238 -4.46992228993118 -1.78273550842006 c
		-6.08798517340545 -2.81283467208669 -0.07452135005035 c
		-5.43360702865754 -0.26150030226872 3.06272260726882 h
		-0.90353475591661 -0.98502541594504 3.24812363816623 h
		-1.45003788436874 -6.21743330323424 -2.96308868663856 h
		-6.00555531948897 -5.45050873919007 -3.20722429547219 h
		1.93688991771020 -4.12305360960935 0.24152589704411 c
		3.45170194473587 -5.14141001508623 -1.63296337403207 c
		3.78208276454826 -3.36132012325221 2.85981893292862 s
		6.04418888054969 -5.29209677692253 -0.96110337282884 c
		2.71297209459434 -5.72225702627742 -3.45538880042113 h
		6.51248569299234 -4.38394542006328 1.42767675503831 c
		7.50648730806859 -6.04114075229734 -2.19101461888227 h
		8.30004756195579 -4.24357845263866 2.41194439080406 h
		-9.38041910993558 -2.38045399452565 -0.42117271186689 s
		-10.20274477501756 -0.44124349312427 2.28877393118871 c
		-12.25108885031923 -0.17010936703010 2.19024361062005 h
		-9.71900512061696 -1.40419690783720 4.05642753534220 h
		-9.25161726644422 1.39359176477945 2.19088044832683 h
		4.60124502808380 1.59785604193532 -1.75342207664673 c
		2.00615027020659 2.02076541211833 -1.85937524146537 c
		0.78862050977584 3.67425499140581 -0.17287970554091 c
		2.30801701239988 4.89083610931786 1.65166599356924 c
		4.89368770605238 4.46992228993118 1.78273550842006 c
		6.08798517340545 2.81283467208669 0.07452135005035 c
		5.43360702865754 0.26150030226872 -3.06272260726882 h
		0.90353475591661 0.98502541594504 -3.24812363816623 h
		1.45003788436874 6.21743330323424 2.96308868663856 h
		6.00555531948897 5.45050873919007 3.20722429547219 h
		-1.93688991771020 4.12305360960935 -0.24152589704411 c
		-3.45170194473587 5.14141001508623 1.63296337403207 c
		-3.78208276454826 3.36132012325221 -2.85981893292862 s
		-6.04418888054969 5.29209677692253 0.96110337282884 c
		-2.71297209459434 5.72225702627742 3.45538880042113 h
		-6.51248569299234 4.38394542006328 -1.42767675503831 c
		-7.50648730806859 6.04114075229734 2.19101461888227 h
		-8.30004756195579 4.24357845263866 -2.41194439080406 h
		9.38041910993558 2.38045399452565 0.42117271186689 s
		10.20274477501756 0.44124349312427 -2.28877393118871 c
		12.25108885031923 0.17010936703010 -2.19024361062005 h
		9.25161726644422 -1.39359176477945 -2.19088044832683 h
		9.71900512061696 1.40419690783720 -4.05642753534220 h

## Sheet: 2
S-T1: the second conformer; its geometry is listed below
quantity (named in a self-explanatory way)	value	unit (with comments)
HF_dimer	-2435.24	h
HF_monomer1	-1217.63	h
HF_monomer2	-1217.63	h
MP2a5Z_dimer	-4.66287	h
MP2a5Z_monomer1	-2.31036	h
MP2a5Z_monomer2	-2.31035	h
CCaTZ_dimer	-4.66123	h
CCaTZ_monomer1	-2.31487	h
CCaTZ_monomer2	-2.31487	h
MP2aTZ_dimer	-4.33598	h
MP2aTZ_monomer1	-2.14731	h
MP2aTZ_monomer2	-2.14731	h
correction_dimer	-0.325258	in h: CCaTZ_dimer - MP2aTZ_dimer
correction_monomer1	-0.167563	in h: CCaTZ_monomer1 - MP2aTZ_monomer1
correction_monomer2	-0.167563	in h: CCaTZ_monomer2 - MP2aTZ_monomer2
E_dimer	-2440.23	in h: HF_dimer + MP2a5Z_dimer + correction_dimer
E_monomer1	-1220.11	in h: HF_monomer1 + MP2a5Z_monomer1 + correction_monomer1
E_monomer2	-1220.11	in h: HF_monomer2 + MP2a5Z_monomer2 + correction_monomer2
HF_part	37.611	kJ/mol: 2625.5*(HF_dimer-HF_monomer1-HF_monomer2)
MP2_part	-110.698	kJ/mol: 2625.5*(MP2a5Z_dimer-MP2a5Z_monomer1-MP2a5Z_monomer2)
correction_part	25.9077	kJ/mol: 2625.5*(correction_dimer-correction_monomer1-correction_monomer2)
dE	-47.1797	kJ/mol: 2625.5*(E_dimer - E_monomer1 - E_monomer2)
		Turbomole input of coordinates (in Bohr):
		-4.60148313357654 -1.59870830842125 1.75366585131788 c -2.00688915312455 -2.02011723605475 1.85949051475947 c -0.78801579741331 -3.67362760232969 0.17196507809259 c -2.30735560825337 -4.89061123190804 -1.65162064014205 c -4.89439068417382 -4.46920230427455 -1.78201174331116 c -6.08869760015754 -2.81191248573384 -0.07369931918254 c -5.43296263204622 -0.26078220633822 3.06324606140763 h -0.90328909…

## Sheet: 3
S-T1: the third conformer; its geometry is listed below
quantity (named in a self-explanatory way)	value	unit (with comments)
HF_dimer	-2435.24	h
HF_monomer1	-1217.63	h
HF_monomer2	-1217.63	h
MP2a5Z_dimer	-4.66503	h
MP2a5Z_monomer1	-2.31047	h
MP2a5Z_monomer2	-2.31046	h
CCaTZ_dimer	-4.66284	h
CCaTZ_monomer1	-2.31501	h
CCaTZ_monomer2	-2.31501	h
MP2aTZ_dimer	-4.33807	h
MP2aTZ_monomer1	-2.14744	h
MP2aTZ_monomer2	-2.14744	h
correction_dimer	-0.324767	in h: CCaTZ_dimer - MP2aTZ_dimer
correction_monomer1	-0.167573	in h: CCaTZ_monomer1 - MP2aTZ_monomer1
correction_monomer2	-0.167573	in h: CCaTZ_monomer2 - MP2aTZ_monomer2
E_dimer	-2440.23	in h: HF_dimer + MP2a5Z_dimer + correction_dimer
E_monomer1	-1220.11	in h: HF_monomer1 + MP2a5Z_monomer1 + correction_monomer1
E_monomer2	-1220.11	in h: HF_monomer2 + MP2a5Z_monomer2 + correction_monomer2
HF_part	42.2065	kJ/mol: 2625.5*(HF_dimer-HF_monomer1-HF_monomer2)
MP2_part	-115.753	kJ/mol: 2625.5*(MP2a5Z_dimer-MP2a5Z_monomer1-MP2a5Z_monomer2)
correction_part	27.2503	kJ/mol: 2625.5*(correction_dimer-correction_monomer1-correction_monomer2)
dE	-46.2966	kJ/mol: 2625.5*(E_dimer - E_monomer1 - E_monomer2)
		Turbomole input of coordinates (in Bohr):
		-4.60148313357654 -1.59870830842125 1.75366585131788 c -2.00688915312455 -2.02011723605475 1.85949051475947 c -0.78801579741331 -3.67362760232969 0.17196507809259 c -2.30735560825337 -4.89061123190804 -1.65162064014205 c -4.89439068417382 -4.46920230427455 -1.78201174331116 c -6.08869760015754 -2.81191248573384 -0.07369931918254 c -5.43296263204622 -0.26078220633822 3.06324606140763 h -0.90328909…

## Sheet: 4
S-T1: the fourth conformer; its geometry is listed below
quantity (named in a self-explanatory way)	value	unit (with comments)
HF_dimer	-2435.24	h
HF_monomer1	-1217.63	h
HF_monomer2	-1217.63	h
MP2a5Z_dimer	-4.66763	h
MP2a5Z_monomer1	-2.31056	h
MP2a5Z_monomer2	-2.31053	h
CCaTZ_dimer	-4.66485	h
CCaTZ_monomer1	-2.31514	h
CCaTZ_monomer2	-2.31514	h
MP2aTZ_dimer	-4.3407	h
MP2aTZ_monomer1	-2.14757	h
MP2aTZ_monomer2	-2.14757	h
correction_dimer	-0.324149	in h: CCaTZ_dimer - MP2aTZ_dimer
correction_monomer1	-0.167574	in h: CCaTZ_monomer1 - MP2aTZ_monomer1
correction_monomer2	-0.167574	in h: CCaTZ_monomer2 - MP2aTZ_monomer2
E_dimer	-2440.23	in h: HF_dimer + MP2a5Z_dimer + correction_dimer
E_monomer1	-1220.11	in h: HF_monomer1 + MP2a5Z_monomer1 + correction_monomer1
E_monomer2	-1220.11	in h: HF_monomer2 + MP2a5Z_monomer2 + correction_monomer2
HF_part	49.6937	kJ/mol: 2625.5*(HF_dimer-HF_monomer1-HF_monomer2)
MP2_part	-122.176	kJ/mol: 2625.5*(MP2a5Z_dimer-MP2a5Z_monomer1-MP2a5Z_monomer2)
correction_part	28.8782	kJ/mol: 2625.5*(correction_dimer-correction_monomer1-correction_monomer2)
dE	-43.6036	kJ/mol: 2625.5*(E_dimer - E_monomer1 - E_monomer2)
		Turbomole input of coordinates (in Bohr):
		-4.60148313357654 -1.59870830842125 1.75366585131788 c -2.00688915312455 -2.02011723605475 1.85949051475947 c -0.78801579741331 -3.67362760232969 0.17196507809259 c -2.30735560825337 -4.89061123190804 -1.65162064014205 c -4.89439068417382 -4.46920230427455 -1.78201174331116 c -6.08869760015754 -2.81191248573384 -0.07369931918254 c -5.43296263204622 -0.26078220633822 3.06324606140763 h -0.90328909…

## Sheet: 5
S-T1: the fifth conformer; its geometry is listed below
quantity (named in a self-explanatory way)	value	unit (with comments)
HF_dimer	-2435.23	h
HF_monomer1	-1217.63	h
HF_monomer2	-1217.63	h
MP2a5Z_dimer	-4.67077	h
MP2a5Z_monomer1	-2.31057	h
MP2a5Z_monomer2	-2.31055	h
CCaTZ_dimer	-4.66727	h
CCaTZ_monomer1	-2.31525	h
CCaTZ_monomer2	-2.31525	h
MP2aTZ_dimer	-4.34387	h
MP2aTZ_monomer1	-2.14768	h
MP2aTZ_monomer2	-2.14768	h
correction_dimer	-0.323404	in h: CCaTZ_dimer - MP2aTZ_dimer
correction_monomer1	-0.167574	in h: CCaTZ_monomer1 - MP2aTZ_monomer1
correction_monomer2	-0.167574	in h: CCaTZ_monomer2 - MP2aTZ_monomer2
E_dimer	-2440.23	in h: HF_dimer + MP2a5Z_dimer + correction_dimer
E_monomer1	-1220.11	in h: HF_monomer1 + MP2a5Z_monomer1 + correction_monomer1
E_monomer2	-1220.11	in h: HF_monomer2 + MP2a5Z_monomer2 + correction_monomer2
HF_part	60.6785	kJ/mol: 2625.5*(HF_dimer-HF_monomer1-HF_monomer2)
MP2_part	-130.38	kJ/mol: 2625.5*(MP2a5Z_dimer-MP2a5Z_monomer1-MP2a5Z_monomer2)
correction_part	30.8338	kJ/mol: 2625.5*(correction_dimer-correction_monomer1-correction_monomer2)
dE	-38.8681	kJ/mol: 2625.5*(E_dimer - E_monomer1 - E_monomer2)
		Turbomole input of coordinates (in Bohr):
		-4.60148313357654 -1.59870830842125 1.75366585131788 c -2.00688915312455 -2.02011723605475 1.85949051475947 c -0.78801579741331 -3.67362760232969 0.17196507809259 c -2.30735560825337 -4.89061123190804 -1.65162064014205 c -4.89439068417382 -4.46920230427455 -1.78201174331116 c -6.08869760015754 -2.81191248573384 -0.07369931918254 c -5.43296263204622 -0.26078220633822 3.06324606140763 h -0.90328909…
