# Supplementary material for: On the Intermolecular Interactions in Thiophene-Cored Single-Stacking Junctions
Source: Int J Mol Sci. 2023 Aug 28;24(17):13349. doi: 10.3390/ijms241713349 (PMC10487960; doi:10.3390/ijms241713349)
Supplement: Supplementary file 1 [file ijms-24-13349-s001.zip › DLPNO.xlsx]

## Sheet: 1
S-T1: unsymmetric
quantity (named in a self-explanatory way)	value	unit (with comments)
HF_dimer	-2435.23	h (using the aQZ basis set)
HF_monomer1	-1217.62	h (using the aQZ basis set)
HF_monomer2	-1217.62	h (using the aQZ basis set)
MP2aQZ_dimer	-4.56636	h (from the DLPNO approximation)
MP2aQZ_monomer1	-2.26333	h (from the DLPNO approximation)
MP2aQZ_monomer2	-2.26334	h (from the DLPNO approximation)
CCaQZ_dimer	-4.8455	h (from the DLPNO approximation)
CCaQZ_monomer1	-2.40764	h (from the DLPNO approximation)
CCaQZ_monomer2	-2.40762	h (from the DLPNO approximation)
CCaTZ_dimer	-4.64326	h (from the DLPNO approximation)
CCaTZ_monomer1	-2.3068	h (from the DLPNO approximation)
CCaTZ_monomer2	-2.30663	h (from the DLPNO approximation)
MP2aTZ_dimer	-4.33151	h (from the DLPNO approximation)
MP2aTZ_monomer1	-2.14625	h (from the DLPNO approximation)
MP2aTZ_monomer2	-2.1461	h (from the DLPNO approximation)
MP2_dimer	-4.73774	in h: (MP2aTZ_dimer*3^3 - MP2aQZ_dimer*4^3)/(3^3-4^3)
MP2_monomer1	-2.34877	in h: (MP2aTZ_monomer1*3^3 - MP2aQZ_monomer1*4^3)/(3^3-4^3)
MP2_monomer2	-2.34889	in h: (MP2aTZ_monomer2*3^3 - MP2aQZ_monomer2*4^3)/(3^3-4^3)
MP2correction_dimer	-4.73774	in h: (MP2aTZ_dimer*3^3 - MP2aQZ_dimer*4^3)/(3^3-4^3)
MP2correction_monomer1	-2.34877	in h: (MP2aTZ_monomer1*3^3 - MP2aQZ_monomer1*4^3)/(3^3-4^3)
MP2correction_monomer2	-2.34889	in h: (MP2aTZ_monomer2*3^3 - MP2aQZ_monomer2*4^3)/(3^3-4^3)
CCcorrection_dimer	-4.99308	in h: (CCaTZ_dimer*3^3 - CCaQZ_dimer*4^3)/(3^3-4^3)
CCcorrection_monomer1	-2.48123	in h: (CCaTZ_monomer1*3^3 - CCaQZ_monomer1*4^3)/(3^3-4^3)
CCcorrection_monomer2	-2.48131	in h: (CCaTZ_monomer2*3^3 - CCaQZ_monomer2*4^3)/(3^3-4^3)
correction_dimer	-0.255337	in h: CCcorrection_dimer - MP2correction_dimer
correction_monomer1	-0.13246	in h: CCcorrection_monomer1 - MP2correction_monomer1
correction_monomer2	-0.132424	in h: CCcorrection_monomer2 - MP2correction_monomer2
E_dimer	-2440.22	in h: HF_dimer + MP2_dimer + correction_dimer
E_monomer1	-1220.1	in h: HF_monomer1 + MP2_monomer1 + correction_monomer1
E_monomer2	-1220.1	in h: HF_monomer2 + MP2_monomer2 + correction_monomer2
HF_part	29.6513	kJ/mol: 2625.5*(HF_dimer-HF_monomer1-HF_monomer2)
MP2_part	-105.237	kJ/mol: 2625.5*(MP2_dimer-MP2_monomer1-MP2_monomer2)
correction_part	25.0647	kJ/mol: 2625.5*(correction_dimer-correction_monomer1-correction_monomer2)
dE	-50.5206	kJ/mol: 2625.5*(E_dimer - E_monomer1 - E_monomer2)

## Sheet: 2
S-T1: C_i symmetry
quantity (named in a self-explanatory way)	value	unit (with comments)
HF_dimer	-2435.23	h (using the aQZ basis set)
HF_monomer1	-1217.62	h (using the aQZ basis set)
HF_monomer2	-1217.62	h (using the aQZ basis set)
MP2aQZ_dimer	-4.56753	h (from the DLPNO approximation)
MP2aQZ_monomer1	-2.26344	h (from the DLPNO approximation)
MP2aQZ_monomer2	-2.26344	h (from the DLPNO approximation)
CCaQZ_dimer	-4.84577	h (from the DLPNO approximation)
CCaQZ_monomer1	-2.4077	h (from the DLPNO approximation)
CCaQZ_monomer2	-2.4077	h (from the DLPNO approximation)
CCaTZ_dimer	-4.64308	h (from the DLPNO approximation)
CCaTZ_monomer1	-2.30651	h (from the DLPNO approximation)
CCaTZ_monomer2	-2.30651	h (from the DLPNO approximation)
MP2aTZ_dimer	-4.33227	h (from the DLPNO approximation)
MP2aTZ_monomer1	-2.14601	h (from the DLPNO approximation)
MP2aTZ_monomer2	-2.14601	h (from the DLPNO approximation)
MP2_dimer	-4.73921	in h: (MP2aTZ_dimer*3^3 - MP2aQZ_dimer*4^3)/(3^3-4^3)
MP2_monomer1	-2.34914	in h: (MP2aTZ_monomer1*3^3 - MP2aQZ_monomer1*4^3)/(3^3-4^3)
MP2_monomer2	-2.34914	in h: (MP2aTZ_monomer2*3^3 - MP2aQZ_monomer2*4^3)/(3^3-4^3)
MP2correction_dimer	-4.73921	in h: (MP2aTZ_dimer*3^3 - MP2aQZ_dimer*4^3)/(3^3-4^3)
MP2correction_monomer1	-2.34914	in h: (MP2aTZ_monomer1*3^3 - MP2aQZ_monomer1*4^3)/(3^3-4^3)
MP2correction_monomer2	-2.34914	in h: (MP2aTZ_monomer2*3^3 - MP2aQZ_monomer2*4^3)/(3^3-4^3)
CCcorrection_dimer	-4.99369	in h: (CCaTZ_dimer*3^3 - CCaQZ_dimer*4^3)/(3^3-4^3)
CCcorrection_monomer1	-2.48155	in h: (CCaTZ_monomer1*3^3 - CCaQZ_monomer1*4^3)/(3^3-4^3)
CCcorrection_monomer2	-2.48155	in h: (CCaTZ_monomer2*3^3 - CCaQZ_monomer2*4^3)/(3^3-4^3)
correction_dimer	-0.254475	in h: CCcorrection_dimer - MP2correction_dimer
correction_monomer1	-0.132413	in h: CCcorrection_monomer1 - MP2correction_monomer1
correction_monomer2	-0.132413	in h: CCcorrection_monomer2 - MP2correction_monomer2
E_dimer	-2440.22	in h: HF_dimer + MP2_dimer + correction_dimer
E_monomer1	-1220.1	in h: HF_monomer1 + MP2_monomer1 + correction_monomer1
E_monomer2	-1220.1	in h: HF_monomer2 + MP2_monomer2 + correction_monomer2
HF_part	35.3446	kJ/mol: 2625.5*(HF_dimer-HF_monomer1-HF_monomer2)
MP2_part	-107.485	kJ/mol: 2625.5*(MP2_dimer-MP2_monomer1-MP2_monomer2)
correction_part	27.1763	kJ/mol: 2625.5*(correction_dimer-correction_monomer1-correction_monomer2)
dE	-44.964	kJ/mol: 2625.5*(E_dimer - E_monomer1 - E_monomer2)

## Sheet: 3
S-T2: unsymmetric
quantity (named in a self-explanatory way)	value	unit (with comments)
HF_dimer	-3535.69	h (using the aQZ basis set)
HF_monomer1	-1767.86	h (using the aQZ basis set)
HF_monomer2	-1767.86	h (using the aQZ basis set)
MP2aQZ_dimer	-6.31305	h (from the DLPNO approximation)
MP2aQZ_monomer1	-3.12616	h (from the DLPNO approximation)
MP2aQZ_monomer2	-3.12616	h (from the DLPNO approximation)
CCaQZ_dimer	-6.67885	h (from the DLPNO approximation)
CCaQZ_monomer1	-3.31697	h (from the DLPNO approximation)
CCaQZ_monomer2	-3.31697	h (from the DLPNO approximation)
CCaTZ_dimer	-6.39849	h (from the DLPNO approximation)
CCaTZ_monomer1	-3.17702	h (from the DLPNO approximation)
CCaTZ_monomer2	-3.17704	h (from the DLPNO approximation)
MP2aTZ_dimer	-5.98842	h (from the DLPNO approximation)
MP2aTZ_monomer1	-2.96419	h (from the DLPNO approximation)
MP2aTZ_monomer2	-2.96417	h (from the DLPNO approximation)
MP2_dimer	-6.54994	in h: (MP2aTZ_dimer*3^3 - MP2aQZ_dimer*4^3)/(3^3-4^3)
MP2_monomer1	-3.24435	in h: (MP2aTZ_monomer1*3^3 - MP2aQZ_monomer1*4^3)/(3^3-4^3)
MP2_monomer2	-3.24438	in h: (MP2aTZ_monomer2*3^3 - MP2aQZ_monomer2*4^3)/(3^3-4^3)
MP2correction_dimer	-6.54994	in h: (MP2aTZ_dimer*3^3 - MP2aQZ_dimer*4^3)/(3^3-4^3)
MP2correction_monomer1	-3.24435	in h: (MP2aTZ_monomer1*3^3 - MP2aQZ_monomer1*4^3)/(3^3-4^3)
MP2correction_monomer2	-3.24438	in h: (MP2aTZ_monomer2*3^3 - MP2aQZ_monomer2*4^3)/(3^3-4^3)
CCcorrection_dimer	-6.88343	in h: (CCaTZ_dimer*3^3 - CCaQZ_dimer*4^3)/(3^3-4^3)
CCcorrection_monomer1	-3.4191	in h: (CCaTZ_monomer1*3^3 - CCaQZ_monomer1*4^3)/(3^3-4^3)
CCcorrection_monomer2	-3.41909	in h: (CCaTZ_monomer2*3^3 - CCaQZ_monomer2*4^3)/(3^3-4^3)
correction_dimer	-0.333493	in h: CCcorrection_dimer - MP2correction_dimer
correction_monomer1	-0.174742	in h: CCcorrection_monomer1 - MP2correction_monomer1
correction_monomer2	-0.174712	in h: CCcorrection_monomer2 - MP2correction_monomer2
E_dimer	-3542.58	in h: HF_dimer + MP2_dimer + correction_dimer
E_monomer1	-1771.28	in h: HF_monomer1 + MP2_monomer1 + correction_monomer1
E_monomer2	-1771.28	in h: HF_monomer2 + MP2_monomer2 + correction_monomer2
HF_part	51.6323	kJ/mol: 2625.5*(HF_dimer-HF_monomer1-HF_monomer2)
MP2_part	-160.701	kJ/mol: 2625.5*(MP2_dimer-MP2_monomer1-MP2_monomer2)
correction_part	41.9055	kJ/mol: 2625.5*(correction_dimer-correction_monomer1-correction_monomer2)
dE	-67.163	kJ/mol: 2625.5*(E_dimer - E_monomer1 - E_monomer2)

## Sheet: 4
S-T2: C_i symmetry
quantity (named in a self-explanatory way)	value	unit (with comments)
HF_dimer	-3535.69	h (using the aQZ basis set)
HF_monomer1	-1767.86	h (using the aQZ basis set)
HF_monomer2	-1767.86	h (using the aQZ basis set)
MP2aQZ_dimer	-6.31735	h (from the DLPNO approximation)
MP2aQZ_monomer1	-3.12843	h (from the DLPNO approximation)
MP2aQZ_monomer2	-3.12843	h (from the DLPNO approximation)
CCaQZ_dimer	-6.67974	h (from the DLPNO approximation)
CCaQZ_monomer1	-3.31773	h (from the DLPNO approximation)
CCaQZ_monomer2	-3.31773	h (from the DLPNO approximation)
CCaTZ_dimer	-6.39893	h (from the DLPNO approximation)
CCaTZ_monomer1	-3.17751	h (from the DLPNO approximation)
CCaTZ_monomer2	-3.17751	h (from the DLPNO approximation)
MP2aTZ_dimer	-5.99234	h (from the DLPNO approximation)
MP2aTZ_monomer1	-2.96617	h (from the DLPNO approximation)
MP2aTZ_monomer2	-2.96617	h (from the DLPNO approximation)
MP2_dimer	-6.55452	in h: (MP2aTZ_dimer*3^3 - MP2aQZ_dimer*4^3)/(3^3-4^3)
MP2_monomer1	-3.24685	in h: (MP2aTZ_monomer1*3^3 - MP2aQZ_monomer1*4^3)/(3^3-4^3)
MP2_monomer2	-3.24684	in h: (MP2aTZ_monomer2*3^3 - MP2aQZ_monomer2*4^3)/(3^3-4^3)
MP2correction_dimer	-6.55452	in h: (MP2aTZ_dimer*3^3 - MP2aQZ_dimer*4^3)/(3^3-4^3)
MP2correction_monomer1	-3.24685	in h: (MP2aTZ_monomer1*3^3 - MP2aQZ_monomer1*4^3)/(3^3-4^3)
MP2correction_monomer2	-3.24684	in h: (MP2aTZ_monomer2*3^3 - MP2aQZ_monomer2*4^3)/(3^3-4^3)
CCcorrection_dimer	-6.88466	in h: (CCaTZ_dimer*3^3 - CCaQZ_dimer*4^3)/(3^3-4^3)
CCcorrection_monomer1	-3.42005	in h: (CCaTZ_monomer1*3^3 - CCaQZ_monomer1*4^3)/(3^3-4^3)
CCcorrection_monomer2	-3.42005	in h: (CCaTZ_monomer2*3^3 - CCaQZ_monomer2*4^3)/(3^3-4^3)
correction_dimer	-0.330135	in h: CCcorrection_dimer - MP2correction_dimer
correction_monomer1	-0.173207	in h: CCcorrection_monomer1 - MP2correction_monomer1
correction_monomer2	-0.173207	in h: CCcorrection_monomer2 - MP2correction_monomer2
E_dimer	-3542.58	in h: HF_dimer + MP2_dimer + correction_dimer
E_monomer1	-1771.28	in h: HF_monomer1 + MP2_monomer1 + correction_monomer1
E_monomer2	-1771.28	in h: HF_monomer2 + MP2_monomer2 + correction_monomer2
HF_part	52.3426	kJ/mol: 2625.5*(HF_dimer-HF_monomer1-HF_monomer2)
MP2_part	-159.718	kJ/mol: 2625.5*(MP2_dimer-MP2_monomer1-MP2_monomer2)
correction_part	42.7416	kJ/mol: 2625.5*(correction_dimer-correction_monomer1-correction_monomer2)
dE	-64.6336	kJ/mol: 2625.5*(E_dimer - E_monomer1 - E_monomer2)

## Sheet: 5
S-T3: unsymmetric
quantity (named in a self-explanatory way)	value	unit (with comments)
HF_dimer	-4636.15	h (using the aQZ basis set)
HF_monomer1	-2318.09	h (using the aQZ basis set)
HF_monomer2	-2318.09	h (using the aQZ basis set)
MP2aQZ_dimer	-8.06553	h (from the DLPNO approximation)
MP2aQZ_monomer1	-3.99012	h (from the DLPNO approximation)
MP2aQZ_monomer2	-3.99012	h (from the DLPNO approximation)
CCaQZ_dimer	-8.51612	h (from the DLPNO approximation)
CCaQZ_monomer1	-4.22697	h (from the DLPNO approximation)
CCaQZ_monomer2	-4.22698	h (from the DLPNO approximation)
CCaTZ_dimer	-8.1583	h (from the DLPNO approximation)
CCaTZ_monomer1	-4.04822	h (from the DLPNO approximation)
CCaTZ_monomer2	-4.04823	h (from the DLPNO approximation)
MP2aTZ_dimer	-7.65184	h (from the DLPNO approximation)
MP2aTZ_monomer1	-3.78349	h (from the DLPNO approximation)
MP2aTZ_monomer2	-3.78349	h (from the DLPNO approximation)
MP2_dimer	-8.36742	in h: (MP2aTZ_dimer*3^3 - MP2aQZ_dimer*4^3)/(3^3-4^3)
MP2_monomer1	-4.1409	in h: (MP2aTZ_monomer1*3^3 - MP2aQZ_monomer1*4^3)/(3^3-4^3)
MP2_monomer2	-4.1409	in h: (MP2aTZ_monomer2*3^3 - MP2aQZ_monomer2*4^3)/(3^3-4^3)
MP2correction_dimer	-8.36742	in h: (MP2aTZ_dimer*3^3 - MP2aQZ_dimer*4^3)/(3^3-4^3)
MP2correction_monomer1	-4.1409	in h: (MP2aTZ_monomer1*3^3 - MP2aQZ_monomer1*4^3)/(3^3-4^3)
MP2correction_monomer2	-4.1409	in h: (MP2aTZ_monomer2*3^3 - MP2aQZ_monomer2*4^3)/(3^3-4^3)
CCcorrection_dimer	-8.77723	in h: (CCaTZ_dimer*3^3 - CCaQZ_dimer*4^3)/(3^3-4^3)
CCcorrection_monomer1	-4.35741	in h: (CCaTZ_monomer1*3^3 - CCaQZ_monomer1*4^3)/(3^3-4^3)
CCcorrection_monomer2	-4.35741	in h: (CCaTZ_monomer2*3^3 - CCaQZ_monomer2*4^3)/(3^3-4^3)
correction_dimer	-0.409807	in h: CCcorrection_dimer - MP2correction_dimer
correction_monomer1	-0.216515	in h: CCcorrection_monomer1 - MP2correction_monomer1
correction_monomer2	-0.216514	in h: CCcorrection_monomer2 - MP2correction_monomer2
E_dimer	-4644.93	in h: HF_dimer + MP2_dimer + correction_dimer
E_monomer1	-2322.45	in h: HF_monomer1 + MP2_monomer1 + correction_monomer1
E_monomer2	-2322.45	in h: HF_monomer2 + MP2_monomer2 + correction_monomer2
HF_part	71.0744	kJ/mol: 2625.5*(HF_dimer-HF_monomer1-HF_monomer2)
MP2_part	-224.808	kJ/mol: 2625.5*(MP2_dimer-MP2_monomer1-MP2_monomer2)
correction_part	60.9714	kJ/mol: 2625.5*(correction_dimer-correction_monomer1-correction_monomer2)
dE	-92.7628	kJ/mol: 2625.5*(E_dimer - E_monomer1 - E_monomer2)

## Sheet: 6
S-T3: C_i symmetry
quantity (named in a self-explanatory way)	value	unit (with comments)
HF_dimer	-4636.15	h (using the aQZ basis set)
HF_monomer1	-2318.09	h (using the aQZ basis set)
HF_monomer2	-2318.09	h (using the aQZ basis set)
MP2aQZ_dimer	-8.07085	h (from the DLPNO approximation)
MP2aQZ_monomer1	-3.99471	h (from the DLPNO approximation)
MP2aQZ_monomer2	-3.99471	h (from the DLPNO approximation)
CCaQZ_dimer	-8.51631	h (from the DLPNO approximation)
CCaQZ_monomer1	-4.22863	h (from the DLPNO approximation)
CCaQZ_monomer2	-4.22863	h (from the DLPNO approximation)
CCaTZ_dimer	-8.15704	h (from the DLPNO approximation)
CCaTZ_monomer1	-4.04923	h (from the DLPNO approximation)
CCaTZ_monomer2	-4.04922	h (from the DLPNO approximation)
MP2aTZ_dimer	-7.65566	h (from the DLPNO approximation)
MP2aTZ_monomer1	-3.78744	h (from the DLPNO approximation)
MP2aTZ_monomer2	-3.78743	h (from the DLPNO approximation)
MP2_dimer	-8.37383	in h: (MP2aTZ_dimer*3^3 - MP2aQZ_dimer*4^3)/(3^3-4^3)
MP2_monomer1	-4.14596	in h: (MP2aTZ_monomer1*3^3 - MP2aQZ_monomer1*4^3)/(3^3-4^3)
MP2_monomer2	-4.14597	in h: (MP2aTZ_monomer2*3^3 - MP2aQZ_monomer2*4^3)/(3^3-4^3)
MP2correction_dimer	-8.37383	in h: (MP2aTZ_dimer*3^3 - MP2aQZ_dimer*4^3)/(3^3-4^3)
MP2correction_monomer1	-4.14596	in h: (MP2aTZ_monomer1*3^3 - MP2aQZ_monomer1*4^3)/(3^3-4^3)
MP2correction_monomer2	-4.14597	in h: (MP2aTZ_monomer2*3^3 - MP2aQZ_monomer2*4^3)/(3^3-4^3)
CCcorrection_dimer	-8.77848	in h: (CCaTZ_dimer*3^3 - CCaQZ_dimer*4^3)/(3^3-4^3)
CCcorrection_monomer1	-4.35955	in h: (CCaTZ_monomer1*3^3 - CCaQZ_monomer1*4^3)/(3^3-4^3)
CCcorrection_monomer2	-4.35956	in h: (CCaTZ_monomer2*3^3 - CCaQZ_monomer2*4^3)/(3^3-4^3)
correction_dimer	-0.404645	in h: CCcorrection_dimer - MP2correction_dimer
correction_monomer1	-0.213584	in h: CCcorrection_monomer1 - MP2correction_monomer1
correction_monomer2	-0.213591	in h: CCcorrection_monomer2 - MP2correction_monomer2
E_dimer	-4644.93	in h: HF_dimer + MP2_dimer + correction_dimer
E_monomer1	-2322.45	in h: HF_monomer1 + MP2_monomer1 + correction_monomer1
E_monomer2	-2322.45	in h: HF_monomer2 + MP2_monomer2 + correction_monomer2
HF_part	68.2895	kJ/mol: 2625.5*(HF_dimer-HF_monomer1-HF_monomer2)
MP2_part	-215.033	kJ/mol: 2625.5*(MP2_dimer-MP2_monomer1-MP2_monomer2)
correction_part	59.1536	kJ/mol: 2625.5*(correction_dimer-correction_monomer1-correction_monomer2)
dE	-87.59	kJ/mol: 2625.5*(E_dimer - E_monomer1 - E_monomer2)

## Sheet: 7
S-T4: unsymmetric
quantity (named in a self-explanatory way)	value	unit (with comments)
HF_dimer	-5736.62	h (using the aQZ basis set)
HF_monomer1	-2868.32	h (using the aQZ basis set)
HF_monomer2	-2868.32	h (using the aQZ basis set)
MP2aQZ_dimer	-9.80579	h (from the DLPNO approximation)
MP2aQZ_monomer1	-4.85373	h (from the DLPNO approximation)
MP2aQZ_monomer2	-4.85371	h (from the DLPNO approximation)
CCaQZ_dimer	-10.3461	h (from the DLPNO approximation)
CCaQZ_monomer1	-5.13679	h (from the DLPNO approximation)
CCaQZ_monomer2	-5.1368	h (from the DLPNO approximation)
CCaTZ_dimer	-9.90969	h (from the DLPNO approximation)
CCaTZ_monomer1	-4.91885	h (from the DLPNO approximation)
CCaTZ_monomer2	-4.91885	h (from the DLPNO approximation)
MP2aTZ_dimer	-9.30177	h (from the DLPNO approximation)
MP2aTZ_monomer1	-4.60209	h (from the DLPNO approximation)
MP2aTZ_monomer2	-4.60209	h (from the DLPNO approximation)
MP2_dimer	-10.1736	in h: (MP2aTZ_dimer*3^3 - MP2aQZ_dimer*4^3)/(3^3-4^3)
MP2_monomer1	-5.03737	in h: (MP2aTZ_monomer1*3^3 - MP2aQZ_monomer1*4^3)/(3^3-4^3)
MP2_monomer2	-5.03733	in h: (MP2aTZ_monomer2*3^3 - MP2aQZ_monomer2*4^3)/(3^3-4^3)
MP2correction_dimer	-10.1736	in h: (MP2aTZ_dimer*3^3 - MP2aQZ_dimer*4^3)/(3^3-4^3)
MP2correction_monomer1	-5.03737	in h: (MP2aTZ_monomer1*3^3 - MP2aQZ_monomer1*4^3)/(3^3-4^3)
MP2correction_monomer2	-5.03733	in h: (MP2aTZ_monomer2*3^3 - MP2aQZ_monomer2*4^3)/(3^3-4^3)
CCcorrection_dimer	-10.6645	in h: (CCaTZ_dimer*3^3 - CCaQZ_dimer*4^3)/(3^3-4^3)
CCcorrection_monomer1	-5.29582	in h: (CCaTZ_monomer1*3^3 - CCaQZ_monomer1*4^3)/(3^3-4^3)
CCcorrection_monomer2	-5.29585	in h: (CCaTZ_monomer2*3^3 - CCaQZ_monomer2*4^3)/(3^3-4^3)
correction_dimer	-0.490886	in h: CCcorrection_dimer - MP2correction_dimer
correction_monomer1	-0.258454	in h: CCcorrection_monomer1 - MP2correction_monomer1
correction_monomer2	-0.258515	in h: CCcorrection_monomer2 - MP2correction_monomer2
E_dimer	-5747.28	in h: HF_dimer + MP2_dimer + correction_dimer
E_monomer1	-2873.62	in h: HF_monomer1 + MP2_monomer1 + correction_monomer1
E_monomer2	-2873.62	in h: HF_monomer2 + MP2_monomer2 + correction_monomer2
HF_part	74.8281	kJ/mol: 2625.5*(HF_dimer-HF_monomer1-HF_monomer2)
MP2_part	-259.649	kJ/mol: 2625.5*(MP2_dimer-MP2_monomer1-MP2_monomer2)
correction_part	68.4815	kJ/mol: 2625.5*(correction_dimer-correction_monomer1-correction_monomer2)
dE	-116.34	kJ/mol: 2625.5*(E_dimer - E_monomer1 - E_monomer2)

## Sheet: 8
S-T4: C_i symmetry
quantity (named in a self-explanatory way)	value	unit (with comments)
HF_dimer	-5736.61	h (using the aQZ basis set)
HF_monomer1	-2868.32	h (using the aQZ basis set)
HF_monomer2	-2868.32	h (using the aQZ basis set)
MP2aQZ_dimer	-9.82003	h (from the DLPNO approximation)
MP2aQZ_monomer1	-4.86047	h (from the DLPNO approximation)
MP2aQZ_monomer2	-4.86047	h (from the DLPNO approximation)
CCaQZ_dimer	-10.3491	h (from the DLPNO approximation)
CCaQZ_monomer1	-5.13903	h (from the DLPNO approximation)
CCaQZ_monomer2	-5.13902	h (from the DLPNO approximation)
CCaTZ_dimer	-9.91127	h (from the DLPNO approximation)
CCaTZ_monomer1	-4.92044	h (from the DLPNO approximation)
CCaTZ_monomer2	-4.92044	h (from the DLPNO approximation)
MP2aTZ_dimer	-9.31453	h (from the DLPNO approximation)
MP2aTZ_monomer1	-4.60812	h (from the DLPNO approximation)
MP2aTZ_monomer2	-4.60812	h (from the DLPNO approximation)
MP2_dimer	-10.1889	in h: (MP2aTZ_dimer*3^3 - MP2aQZ_dimer*4^3)/(3^3-4^3)
MP2_monomer1	-5.04463	in h: (MP2aTZ_monomer1*3^3 - MP2aQZ_monomer1*4^3)/(3^3-4^3)
MP2_monomer2	-5.04462	in h: (MP2aTZ_monomer2*3^3 - MP2aQZ_monomer2*4^3)/(3^3-4^3)
MP2correction_dimer	-10.1889	in h: (MP2aTZ_dimer*3^3 - MP2aQZ_dimer*4^3)/(3^3-4^3)
MP2correction_monomer1	-5.04463	in h: (MP2aTZ_monomer1*3^3 - MP2aQZ_monomer1*4^3)/(3^3-4^3)
MP2correction_monomer2	-5.04462	in h: (MP2aTZ_monomer2*3^3 - MP2aQZ_monomer2*4^3)/(3^3-4^3)
CCcorrection_dimer	-10.6686	in h: (CCaTZ_dimer*3^3 - CCaQZ_dimer*4^3)/(3^3-4^3)
CCcorrection_monomer1	-5.29854	in h: (CCaTZ_monomer1*3^3 - CCaQZ_monomer1*4^3)/(3^3-4^3)
CCcorrection_monomer2	-5.29853	in h: (CCaTZ_monomer2*3^3 - CCaQZ_monomer2*4^3)/(3^3-4^3)
correction_dimer	-0.47971	in h: CCcorrection_dimer - MP2correction_dimer
correction_monomer1	-0.25391	in h: CCcorrection_monomer1 - MP2correction_monomer1
correction_monomer2	-0.253911	in h: CCcorrection_monomer2 - MP2correction_monomer2
E_dimer	-5747.28	in h: HF_dimer + MP2_dimer + correction_dimer
E_monomer1	-2873.62	in h: HF_monomer1 + MP2_monomer1 + correction_monomer1
E_monomer2	-2873.62	in h: HF_monomer2 + MP2_monomer2 + correction_monomer2
HF_part	81.2694	kJ/mol: 2625.5*(HF_dimer-HF_monomer1-HF_monomer2)
MP2_part	-261.635	kJ/mol: 2625.5*(MP2_dimer-MP2_monomer1-MP2_monomer2)
correction_part	73.8045	kJ/mol: 2625.5*(correction_dimer-correction_monomer1-correction_monomer2)
dE	-106.561	kJ/mol: 2625.5*(E_dimer - E_monomer1 - E_monomer2)

## Sheet: 9
S-T5: C_i symmetry
quantity (named in a self-explanatory way)	value	unit (with comments)
HF_dimer	-6837.07	h (using the aQZ basis set)
HF_monomer1	-3418.56	h (using the aQZ basis set)
HF_monomer2	-3418.56	h (using the aQZ basis set)
MP2aQZ_dimer	-11.5719	h (from the DLPNO approximation)
MP2aQZ_monomer1	-5.72635	h (from the DLPNO approximation)
MP2aQZ_monomer2	-5.72636	h (from the DLPNO approximation)
CCaQZ_dimer	-12.1844	h (from the DLPNO approximation)
CCaQZ_monomer1	-6.0495	h (from the DLPNO approximation)
CCaQZ_monomer2	-6.0495	h (from the DLPNO approximation)
CCaTZ_dimer	-11.6686	h (from the DLPNO approximation)
CCaTZ_monomer1	-5.79182	h (from the DLPNO approximation)
CCaTZ_monomer2	-5.79181	h (from the DLPNO approximation)
MP2aTZ_dimer	-10.9767	h (from the DLPNO approximation)
MP2aTZ_monomer1	-5.4291	h (from the DLPNO approximation)
MP2aTZ_monomer2	-5.4291	h (from the DLPNO approximation)
MP2_dimer	-12.0062	in h: (MP2aTZ_dimer*3^3 - MP2aQZ_dimer*4^3)/(3^3-4^3)
MP2_monomer1	-5.94326	in h: (MP2aTZ_monomer1*3^3 - MP2aQZ_monomer1*4^3)/(3^3-4^3)
MP2_monomer2	-5.94329	in h: (MP2aTZ_monomer2*3^3 - MP2aQZ_monomer2*4^3)/(3^3-4^3)
MP2correction_dimer	-12.0062	in h: (MP2aTZ_dimer*3^3 - MP2aQZ_dimer*4^3)/(3^3-4^3)
MP2correction_monomer1	-5.94326	in h: (MP2aTZ_monomer1*3^3 - MP2aQZ_monomer1*4^3)/(3^3-4^3)
MP2correction_monomer2	-5.94329	in h: (MP2aTZ_monomer2*3^3 - MP2aQZ_monomer2*4^3)/(3^3-4^3)
CCcorrection_dimer	-12.5608	in h: (CCaTZ_dimer*3^3 - CCaQZ_dimer*4^3)/(3^3-4^3)
CCcorrection_monomer1	-6.23754	in h: (CCaTZ_monomer1*3^3 - CCaQZ_monomer1*4^3)/(3^3-4^3)
CCcorrection_monomer2	-6.23754	in h: (CCaTZ_monomer2*3^3 - CCaQZ_monomer2*4^3)/(3^3-4^3)
correction_dimer	-0.554637	in h: CCcorrection_dimer - MP2correction_dimer
correction_monomer1	-0.294284	in h: CCcorrection_monomer1 - MP2correction_monomer1
correction_monomer2	-0.294258	in h: CCcorrection_monomer2 - MP2correction_monomer2
E_dimer	-6849.63	in h: HF_dimer + MP2_dimer + correction_dimer
E_monomer1	-3424.79	in h: HF_monomer1 + MP2_monomer1 + correction_monomer1
E_monomer2	-3424.79	in h: HF_monomer2 + MP2_monomer2 + correction_monomer2
HF_part	101.187	kJ/mol: 2625.5*(HF_dimer-HF_monomer1-HF_monomer2)
MP2_part	-314.142	kJ/mol: 2625.5*(MP2_dimer-MP2_monomer1-MP2_monomer2)
correction_part	89.0178	kJ/mol: 2625.5*(correction_dimer-correction_monomer1-correction_monomer2)
dE	-123.937	kJ/mol: 2625.5*(E_dimer - E_monomer1 - E_monomer2)

## Sheet: 10
S-T6: C_i symmetry
quantity (named in a self-explanatory way)	value	unit (with comments)
HF_dimer	-7937.54	h (using the aQZ basis set)
HF_monomer1	-3968.79	h (using the aQZ basis set)
HF_monomer2	-3968.79	h (using the aQZ basis set)
MP2aQZ_dimer	-13.3119	h (from the DLPNO approximation)
MP2aQZ_monomer1	-6.59249	h (from the DLPNO approximation)
MP2aQZ_monomer2	-6.5925	h (from the DLPNO approximation)
CCaQZ_dimer	-14.0116	h (from the DLPNO approximation)
CCaQZ_monomer1	-6.96019	h (from the DLPNO approximation)
CCaQZ_monomer2	-6.96018	h (from the DLPNO approximation)
CCaTZ_dimer	-13.4203	h (from the DLPNO approximation)
CCaTZ_monomer1	-6.66329	h (from the DLPNO approximation)
CCaTZ_monomer2	-6.66332	h (from the DLPNO approximation)
MP2aTZ_dimer	-12.6294	h (from the DLPNO approximation)
MP2aTZ_monomer1	-6.25022	h (from the DLPNO approximation)
MP2aTZ_monomer2	-6.25023	h (from the DLPNO approximation)
MP2_dimer	-13.8099	in h: (MP2aTZ_dimer*3^3 - MP2aQZ_dimer*4^3)/(3^3-4^3)
MP2_monomer1	-6.84226	in h: (MP2aTZ_monomer1*3^3 - MP2aQZ_monomer1*4^3)/(3^3-4^3)
MP2_monomer2	-6.84226	in h: (MP2aTZ_monomer2*3^3 - MP2aQZ_monomer2*4^3)/(3^3-4^3)
MP2correction_dimer	-13.8099	in h: (MP2aTZ_dimer*3^3 - MP2aQZ_dimer*4^3)/(3^3-4^3)
MP2correction_monomer1	-6.84226	in h: (MP2aTZ_monomer1*3^3 - MP2aQZ_monomer1*4^3)/(3^3-4^3)
MP2correction_monomer2	-6.84226	in h: (MP2aTZ_monomer2*3^3 - MP2aQZ_monomer2*4^3)/(3^3-4^3)
CCcorrection_dimer	-14.4431	in h: (CCaTZ_dimer*3^3 - CCaQZ_dimer*4^3)/(3^3-4^3)
CCcorrection_monomer1	-7.17684	in h: (CCaTZ_monomer1*3^3 - CCaQZ_monomer1*4^3)/(3^3-4^3)
CCcorrection_monomer2	-7.17681	in h: (CCaTZ_monomer2*3^3 - CCaQZ_monomer2*4^3)/(3^3-4^3)
correction_dimer	-0.633162	in h: CCcorrection_dimer - MP2correction_dimer
correction_monomer1	-0.334582	in h: CCcorrection_monomer1 - MP2correction_monomer1
correction_monomer2	-0.334549	in h: CCcorrection_monomer2 - MP2correction_monomer2
E_dimer	-7951.98	in h: HF_dimer + MP2_dimer + correction_dimer
E_monomer1	-3975.97	in h: HF_monomer1 + MP2_monomer1 + correction_monomer1
E_monomer2	-3975.97	in h: HF_monomer2 + MP2_monomer2 + correction_monomer2
HF_part	108.087	kJ/mol: 2625.5*(HF_dimer-HF_monomer1-HF_monomer2)
MP2_part	-329.251	kJ/mol: 2625.5*(MP2_dimer-MP2_monomer1-MP2_monomer2)
correction_part	94.4367	kJ/mol: 2625.5*(correction_dimer-correction_monomer1-correction_monomer2)
dE	-126.727	kJ/mol: 2625.5*(E_dimer - E_monomer1 - E_monomer2)

[truncated: 10 more sheets: 11, 12, 13, 14, 15, 16, 17, 18, 19, 20]
